# Supplementary material for: Highly efficient and free-standing WS 2 /C electrocatalyst for solar-cell-driven hydrogen evolution reaction
Source: Royal Society of Chemistry journal article supplement (doi:10.1039/d5ta07896b), 2025-12-24
Supplement: d5ta07896b1.pdf [file d5ta07896b1.pdf]

**Supplementary data for:**

**Highly Efficient and Free-standing WS<sub>2</sub>/C Electrocatalyst  
for Solar-cell-driven Hydrogen Evolution Reaction**

Zexia Zhang,<sup>a</sup> Lina Shen,<sup>a</sup> Chen Qin,<sup>a</sup> Ruitao Lv<sup>\*b</sup> and Feiyu Kang<sup>\*c</sup>

<sup>a</sup>*Xinjiang Key Laboratory for Luminescence Minerals and Optical Functional Materials, School of Physics and Electronic Engineering, Xinjiang Normal University, Urumqi 830054, China*

<sup>b</sup>*Key Laboratory of Advanced Materials (MOE), School of Materials Science and Engineering, Tsinghua University, Beijing 100084, China*

<sup>c</sup>*Tsinghua Shenzhen International Graduate School, Shenzhen 518055, China*

<sup>\*</sup>Corresponding author.

*E-mail address:* lvruitao@tsinghua.edu.cn (R. Lv); fykang@tsinghua.edu.cn (F. Kang)

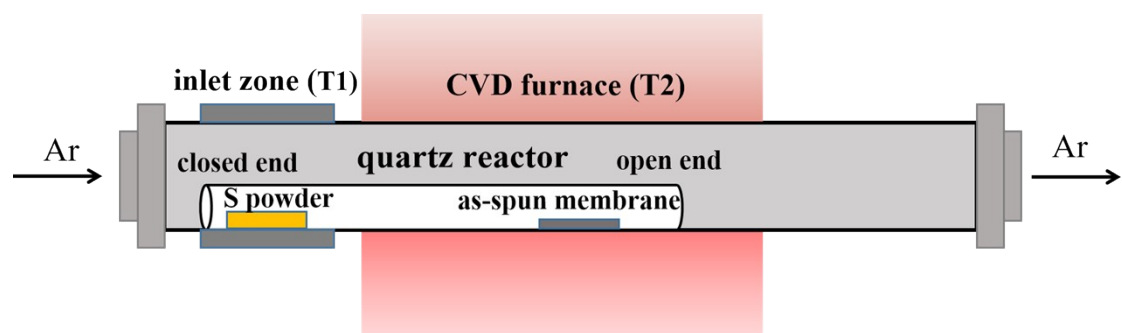

**Fig. S1** Schematic illustration of the synthesis process of WS<sub>2</sub>/C composites.

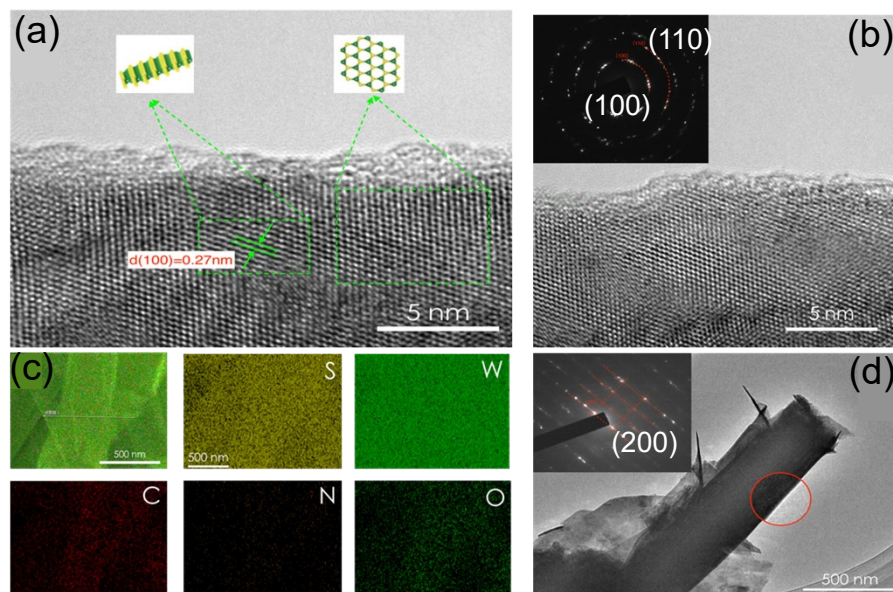

**Fig. S2** (a) TEM images, (b) SAED pattern on nanoplates, (c) elemental mappings and (d) SAED pattern on fibers of 800-2h-O. On both the fiber surface and layered regions, S and W are distributed uniformly.

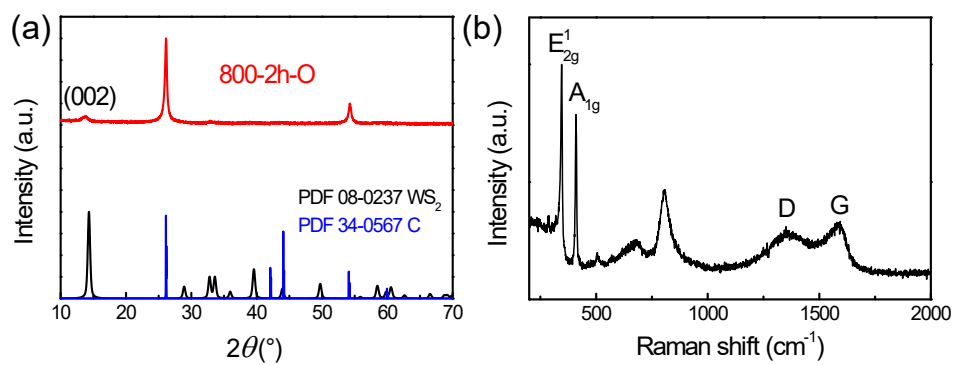

**Fig. S3** (a) XRD patterns and (b) Raman spectrum of 800-2h-O. 2H-phase  $\text{WS}_2$  and carbon matrix composite structure is validated.

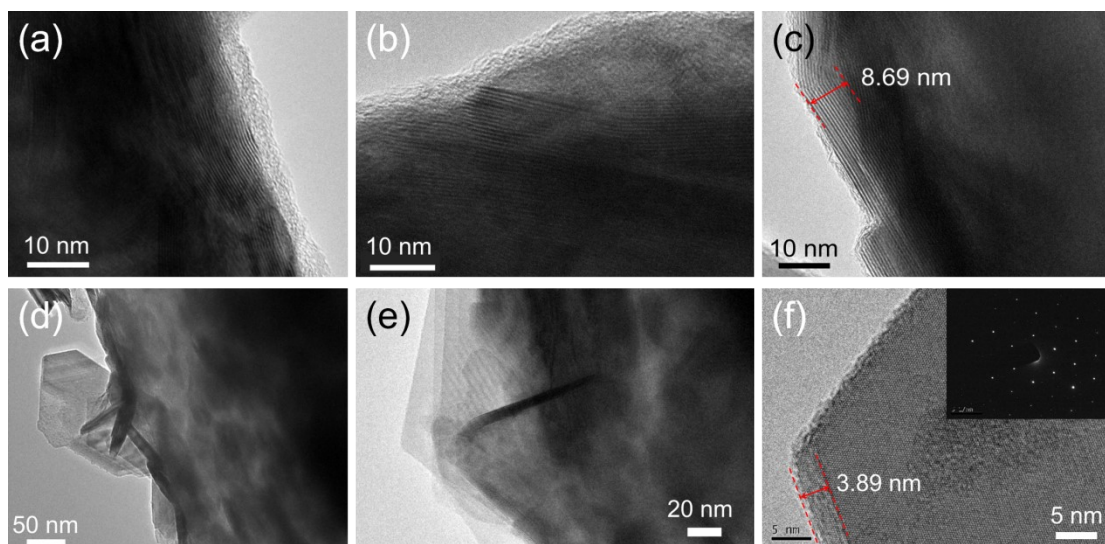

**Fig. S4** TEM images of different areas for S600-1000. (a) (b) (c) The WS<sub>2</sub> nanosheets embedded in surface of S600-1000; (d) (e) (f) The WS<sub>2</sub> nanosheets protruding out from the surface of S600-1000.

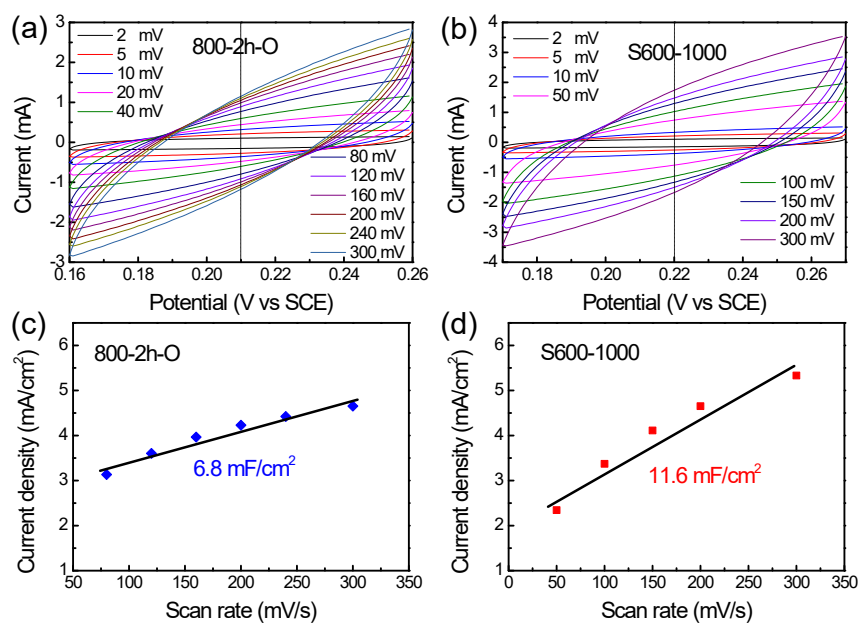

**Fig. S5** CV curves within non-Faradaic regions of (a) 800-2h-O and (b) S600-1000.

Non-faradaic current densities at 0.21 V (vs. RHE) as a function of the potential scan rate for (c) 800-2h-O and (d) S600-1000. The corresponding double-layer capacitance ( $C_{dl}$ ) are approximately 6.8 mF/cm<sup>2</sup> and 11.6 mF/cm<sup>2</sup>.

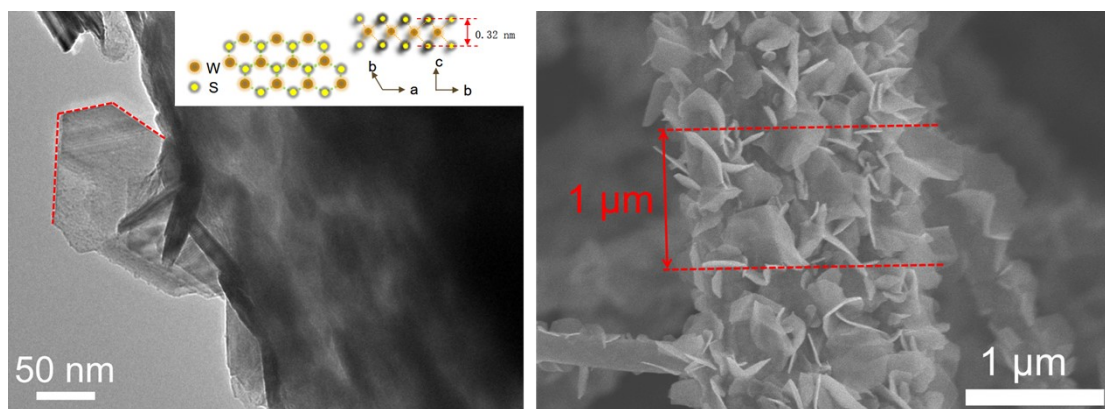

**Fig. S6** (a) TEM and (b) SEM images of S600-1000 used to estimate the amount of edge active sites. Inset of (a) is the schematic of WS<sub>2</sub>.

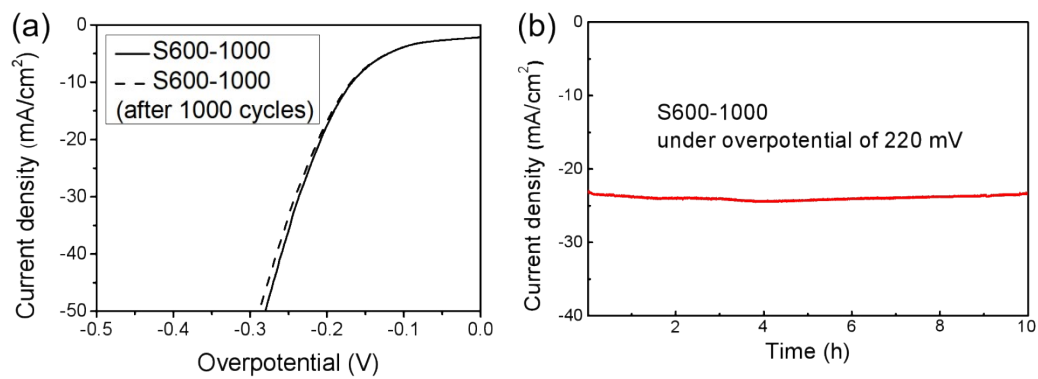

**Fig. S7** (a) Polarization curves of S600-1000 in the initial scan and after 1000 cycles;  
(b) Current density versus time (*i-t*) curves over 10 h for S600-1000 under static overpotential of 220 mV.

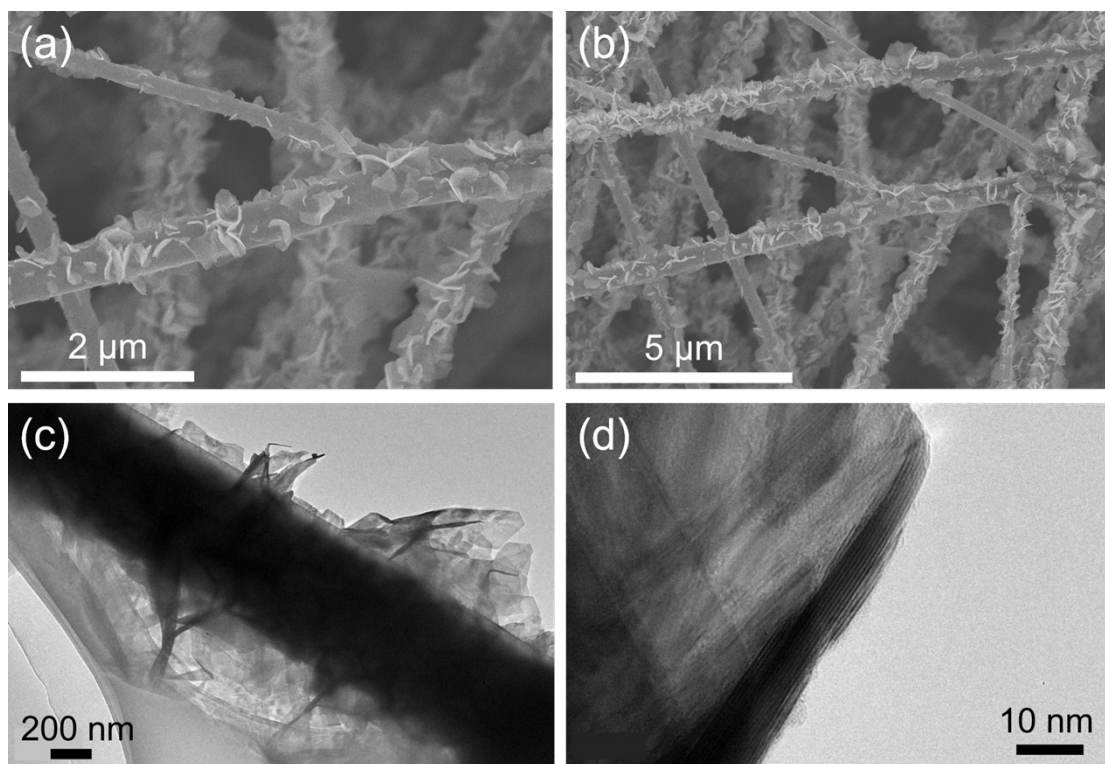

**Fig. S8** SEM (a) (b) and TEM (c) (d) images of S600-1000 after 1000 cycles.

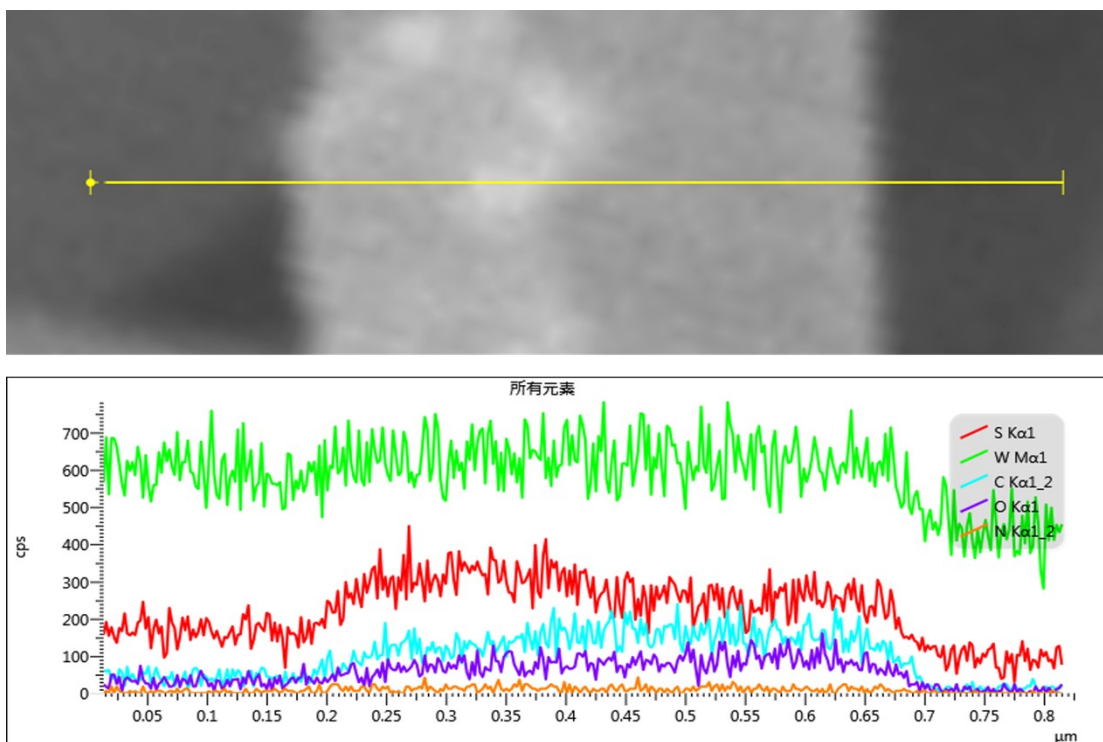

**Fig. S9** Elemental line scanning of the WS<sub>2</sub>/C composite materials after 1000 cycles.

**Table S1** Comparison of overpotential at 10 mA/cm<sup>2</sup> and tafel slopes for some reported carbon-based WS<sub>2</sub> HER catalysts in literature.

| Catalysts                           | Electrolytes                         | $\eta_{10}/\text{mV}$ | Tafel Slope<br>/mV dec <sup>-1</sup> | Ref.                                                |
|-------------------------------------|--------------------------------------|-----------------------|--------------------------------------|-----------------------------------------------------|
| WS <sub>2</sub> /CNF                | 0.5 M H <sub>2</sub> SO <sub>4</sub> | 160                   | 95                                   | this work                                           |
| WS <sub>2</sub> @graphene           | 0.5 M H <sub>2</sub> SO <sub>4</sub> | 117                   | 56                                   | <i>Adv. Mater.</i> , 2020, 32: e2002584             |
| WS <sub>2</sub> /N-rGO/carbon cloth | 0.5 M H <sub>2</sub> SO <sub>4</sub> | 175                   | 85.23                                | <i>Nano Res.</i> , 2023, 17: 1267-1280              |
| WS <sub>2</sub> /C                  | 0.5 M H <sub>2</sub> SO <sub>4</sub> | 179                   | 98                                   | <i>J. Fuel Chem. Technol.</i> , 2021, 49: 1362-1370 |
| WS <sub>2</sub>                     | 0.5 M H <sub>2</sub> SO <sub>4</sub> | 166                   | 82.2                                 | <i>FlatChem</i> , 2021, 29: 100278.                 |

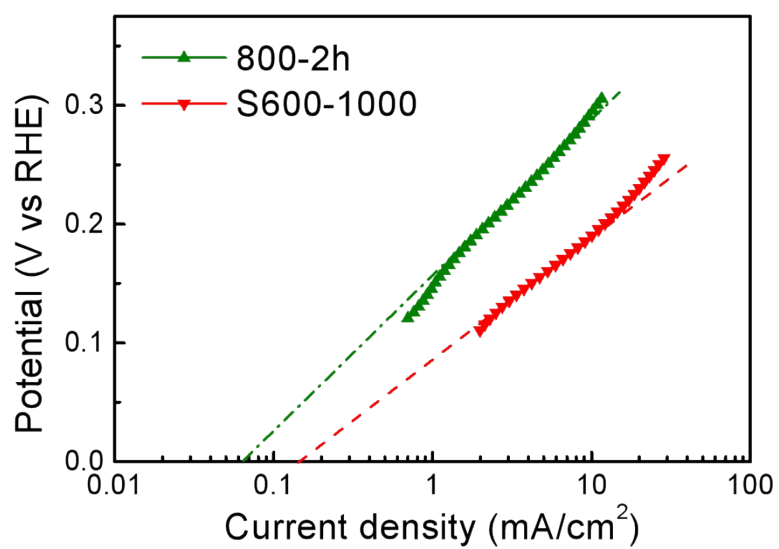

**Fig. S10** Exchange current densities of 800-2h and S600-1000.

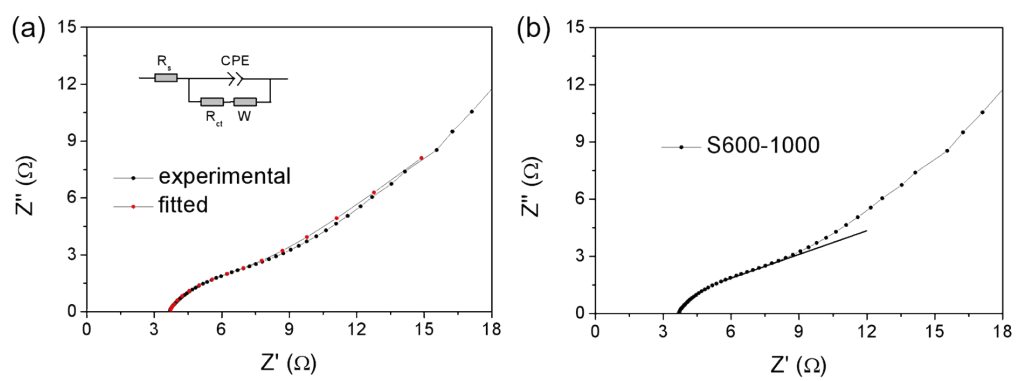

**Fig. S11** (a) Electrochemical impedance spectra of S600-1000; (b) Slope of diffusion area in electrochemical impedance spectra spectra of S600-1000.

**Table S2** The kinetic parameters obtained from fitted electrochemical impedance spectra curves. ( $R_s$ : solution resistance,  $R_{ct}$ : charge transfer resistance,  $R_p$ : the sum of  $R_{ct}$  and Warburg impedance)

| Sample    | $R_s$ ( $\Omega$ ) | $R_{ct}$ ( $\Omega$ ) | $R_p$ ( $\Omega$ ) |
|-----------|--------------------|-----------------------|--------------------|
| S600-1000 | 3.8                | 0.14                  | 16.1               |

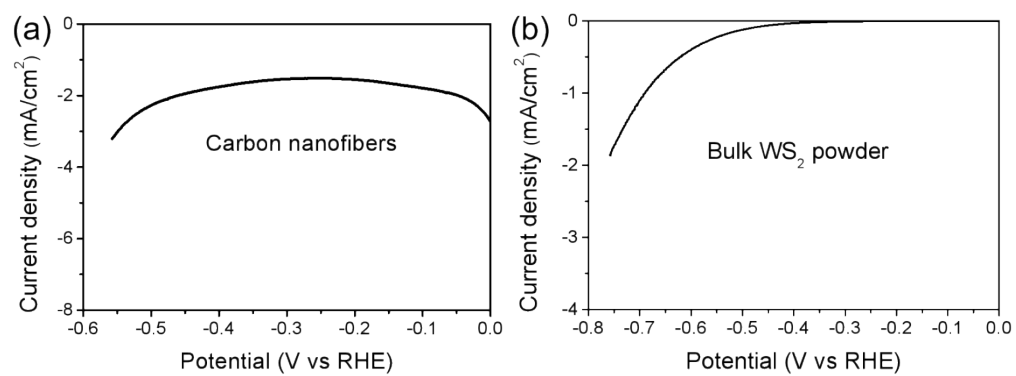

**Fig. S12** Linear sweep voltammogram polarization curves of (a) CNF membrane and (b) bulk WS<sub>2</sub> powder in 0.5 M H<sub>2</sub>SO<sub>4</sub>.

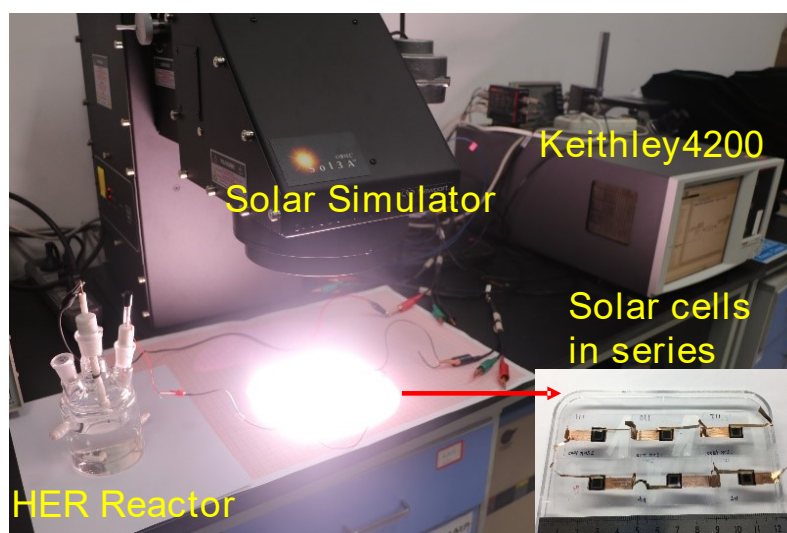

**Fig. S13** Photograph of the carbon-based non-precious metal photovoltaic hydrogen production system constructed by integrating six series-connected carbon-based hybrid solar cells with a HER cell using  $\text{WS}_2/\text{C}$  as the working electrode. Inset showing the corresponding 6-serial solar cell module.

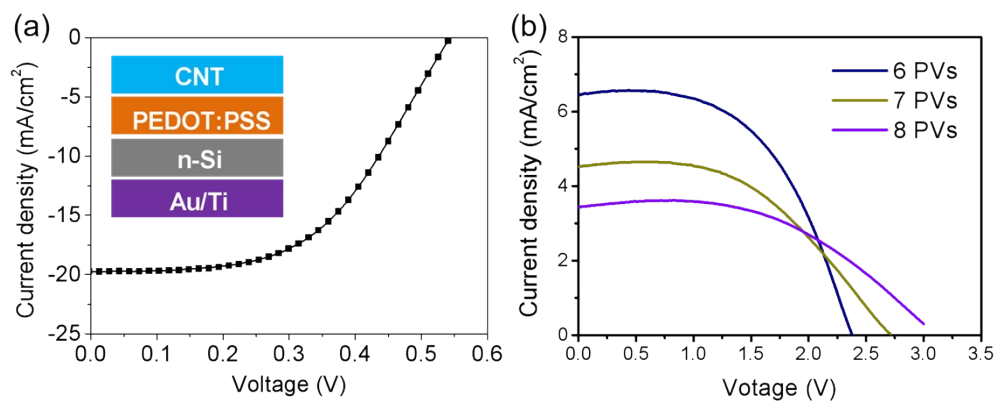

**Fig. S14** Light current density ( $J$ )-voltage ( $V$ ) curves of (a) a carbon-based hybrid solar cell (inset is the schematic of the cell structure) and (b) series connection of six, seven and eight carbon-based hybrid solar cells.

**Table S3** Photovoltaic parameters of the carbon-based hybrid solar cells (CNT/PEDOT:PSS/Si).  $V_{OC}$ ,  $J_{SC}$ , FF and PCE refer to open-circuit voltage, short-circuit current density, fill factor and power conversion efficiency, respectively.

| Cell No. | $V_{OC}$ (mV) | $J_{SC}$ (mA/cm <sup>2</sup> ) | FF (%) | PCE (%) |
|----------|---------------|--------------------------------|--------|---------|
| 1        | 480.0         | 19.3                           | 29.8   | 3.4     |
| 2        | 510.1         | 20.8                           | 37.0   | 4.9     |
| 3        | 525.2         | 20.0                           | 47.6   | 6.2     |
| 4        | 540.2         | 19.8                           | 52.4   | 7.0     |
| 5        | 480.0         | 19.1                           | 34.2   | 3.9     |
| 6        | 630.7         | 19.9                           | 20.0   | 3.1     |
| 7        | 480.0         | 14.3                           | 45.2   | 3.9     |
| 8        | 472.4         | 19.2                           | 27.9   | 3.2     |

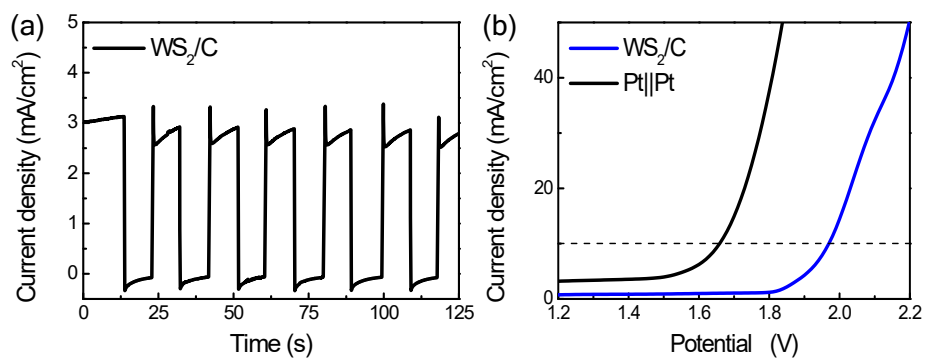

**Fig. S15** (a) Photoelectric response curve and (b) LSV curves for two-electrode system of S600-1000. The  $\eta_{10}$  of Pt and WS<sub>2</sub>/C are 1.66 V and 1.97 V, respectively. The corresponding solar-to-hydrogen conversion efficiency are 5.2% and 4.4%.
